# Supplementary figures and images for: Geobiological feedbacks and the evolution of thermoacidophiles
Source: PubMed Central journal article supplement — ISME J. 2017 Oct 13;12(1):225–36. doi: 10.1038/ismej.2017.162 (PMC5739016; doi:10.1038/ismej.2017.162), 2017-10-13

Supplementary Figure S1

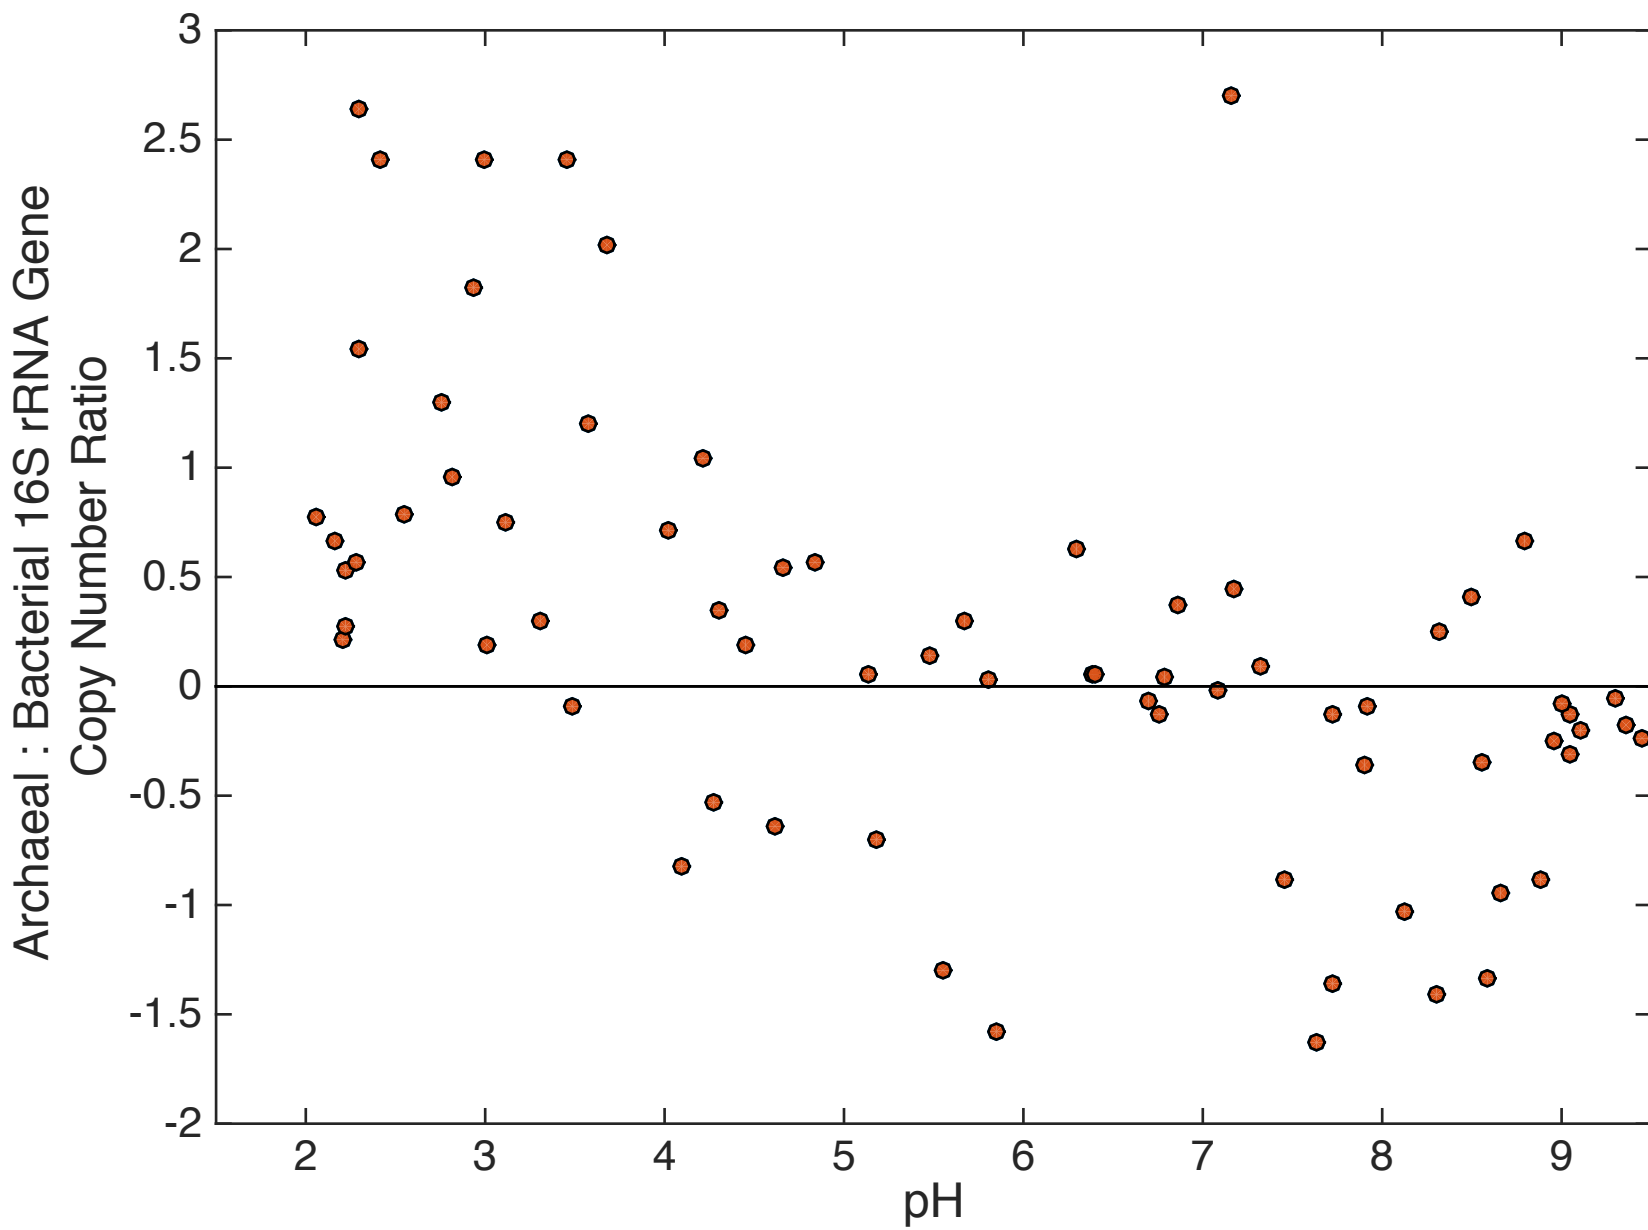

Supplement: ismej2017162x2.pdf [file ismej2017162x2.pdf]

Supplementary Figure S2

Archaeal : Bacterial 16S rRNA Gene  
Copy Number Ratio

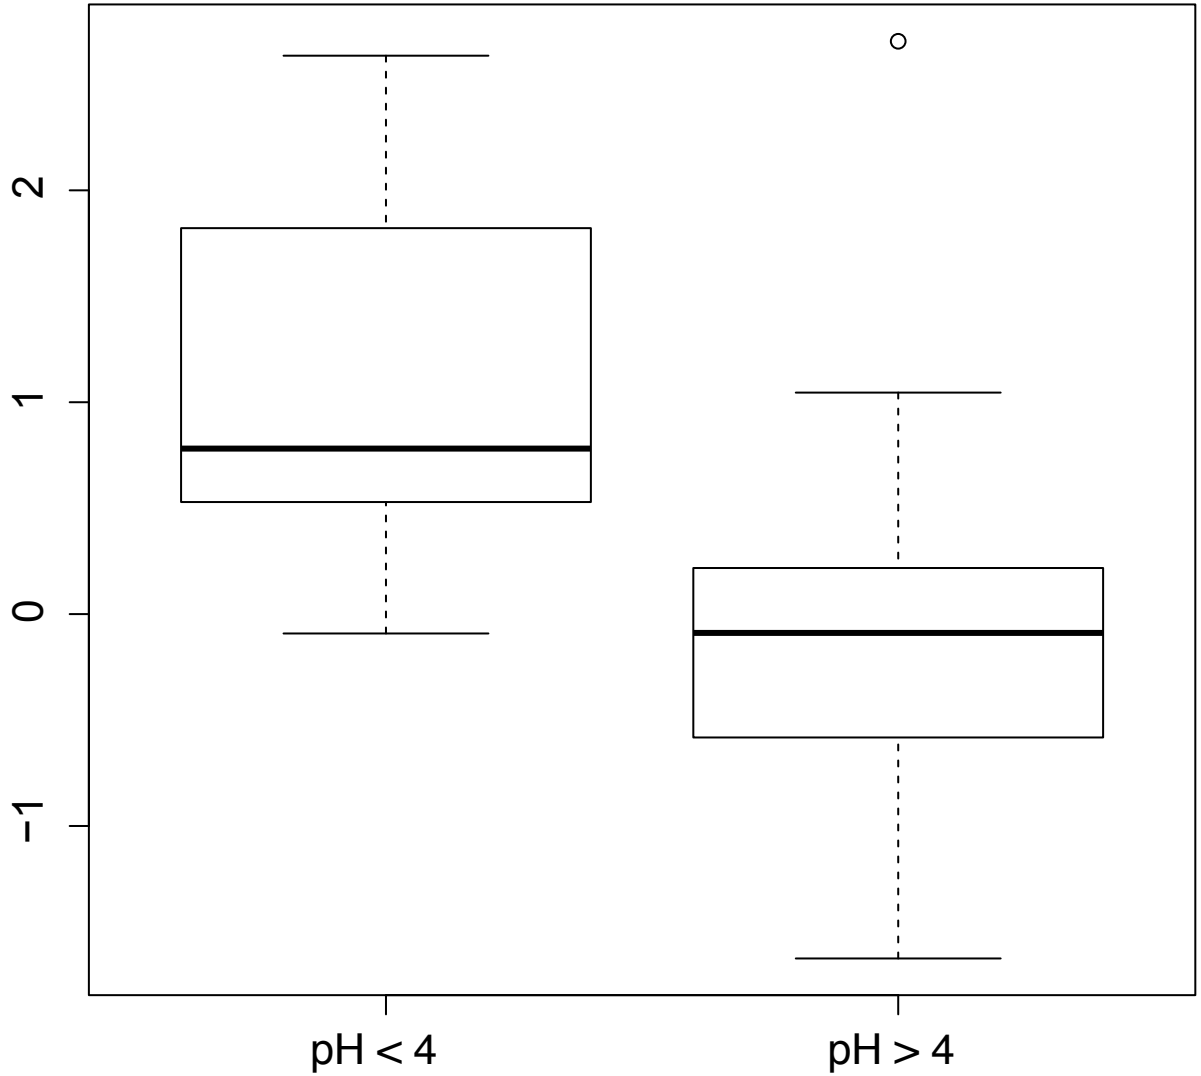

Supplement: ismej2017162x3.pdf [file ismej2017162x3.pdf]

Supplementary Figure S3

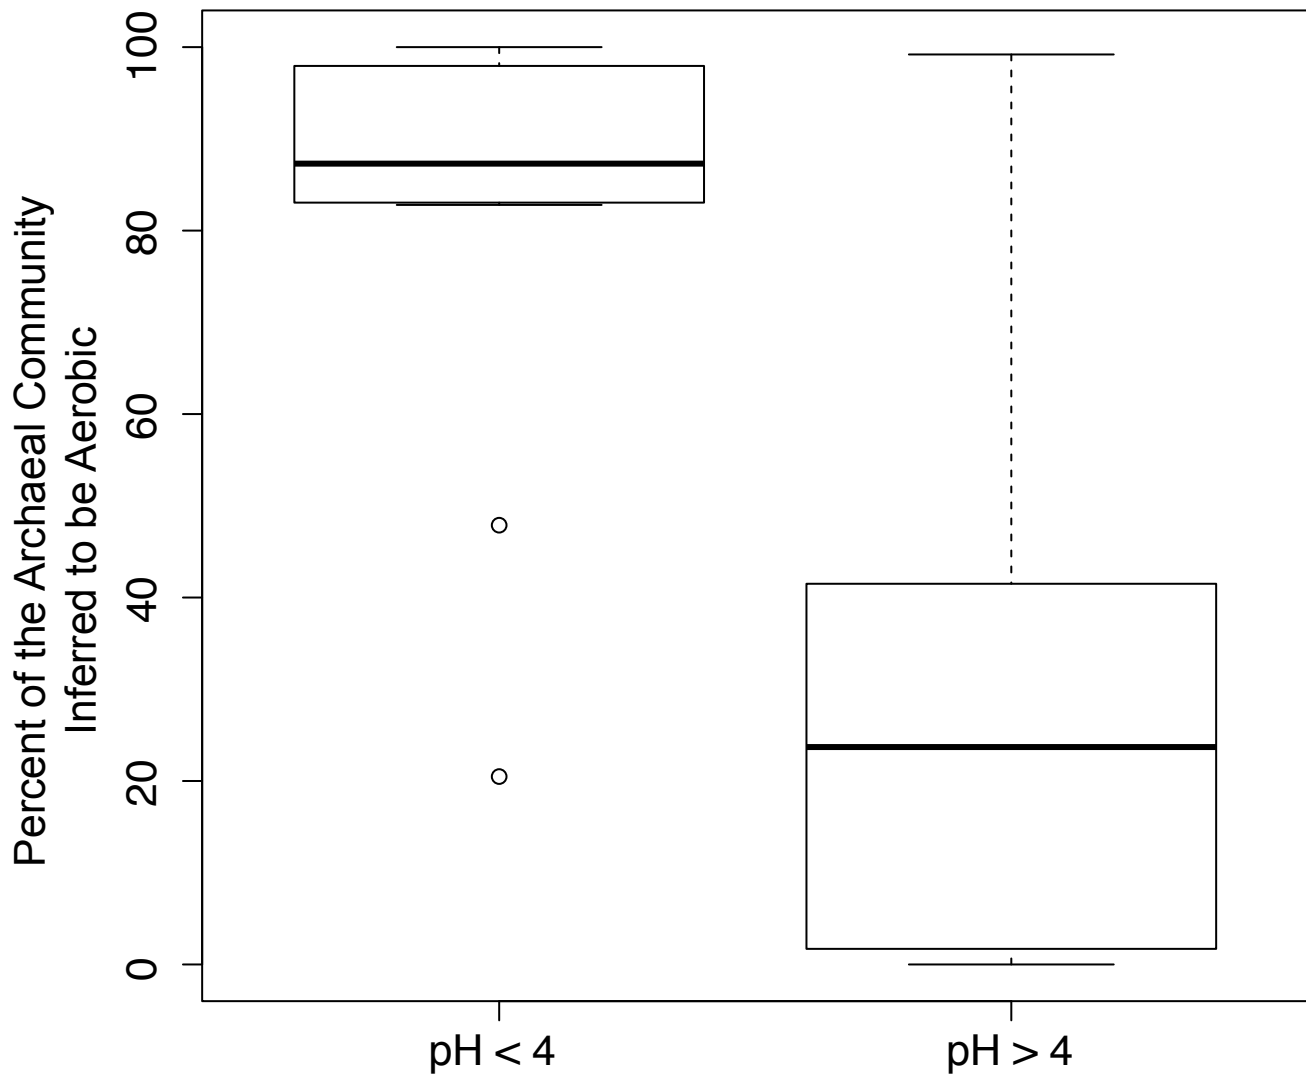

Supplement: ismej2017162x4.pdf [file ismej2017162x4.pdf]

Supplementary Figure S4

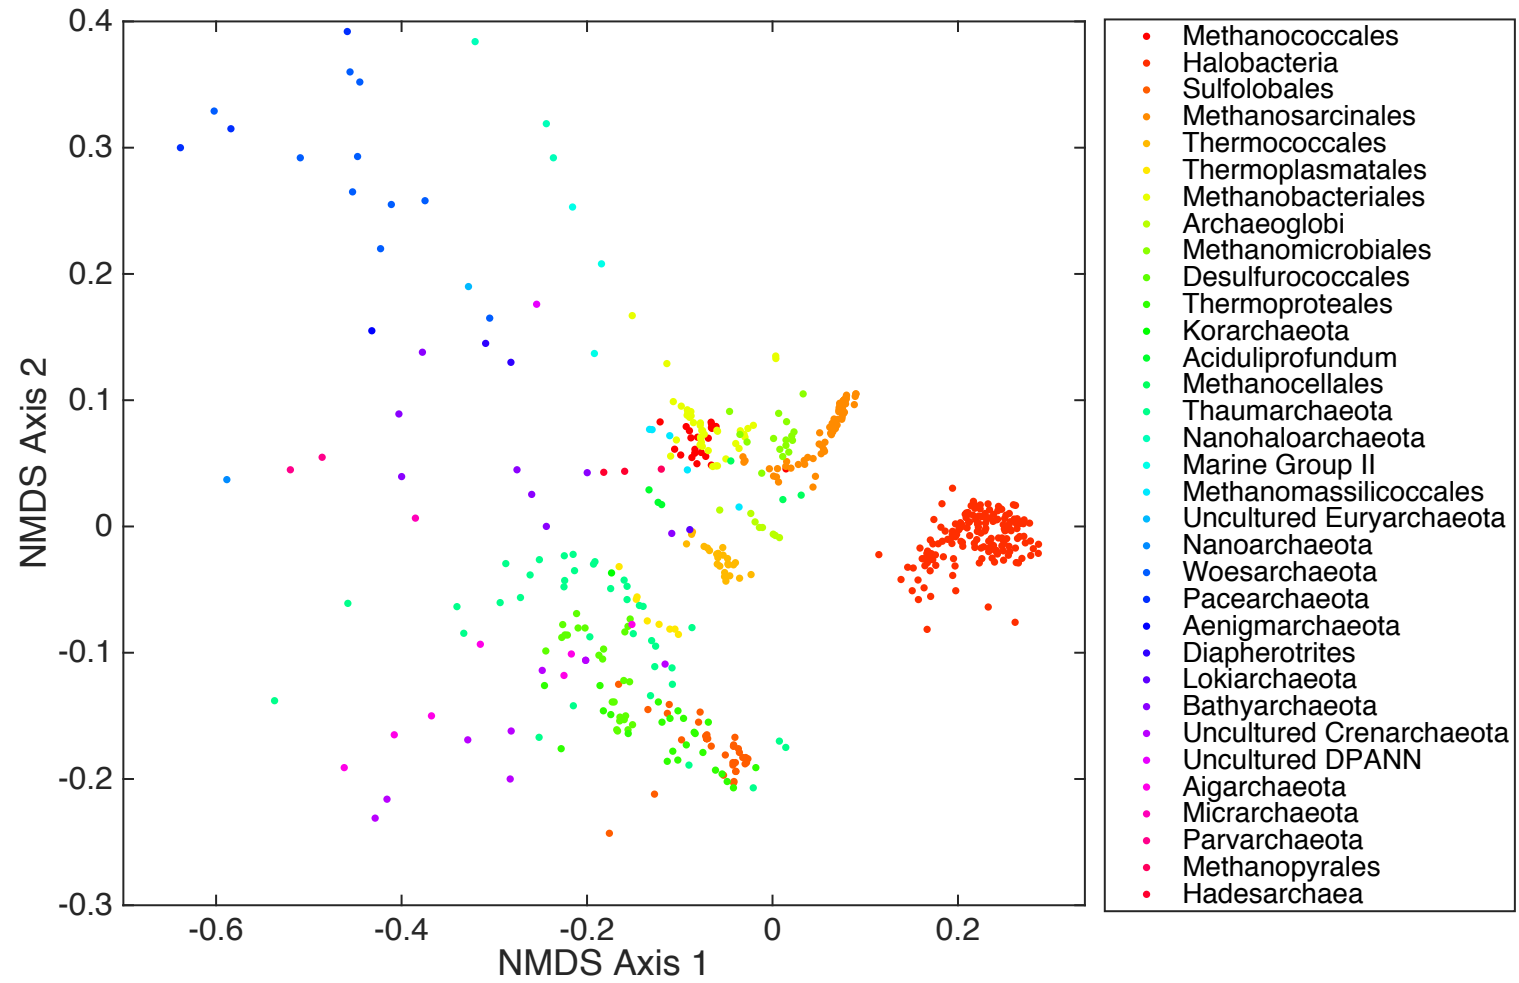

Supplement: ismej2017162x5.pdf [file ismej2017162x5.pdf]

Supplementary Figure S5

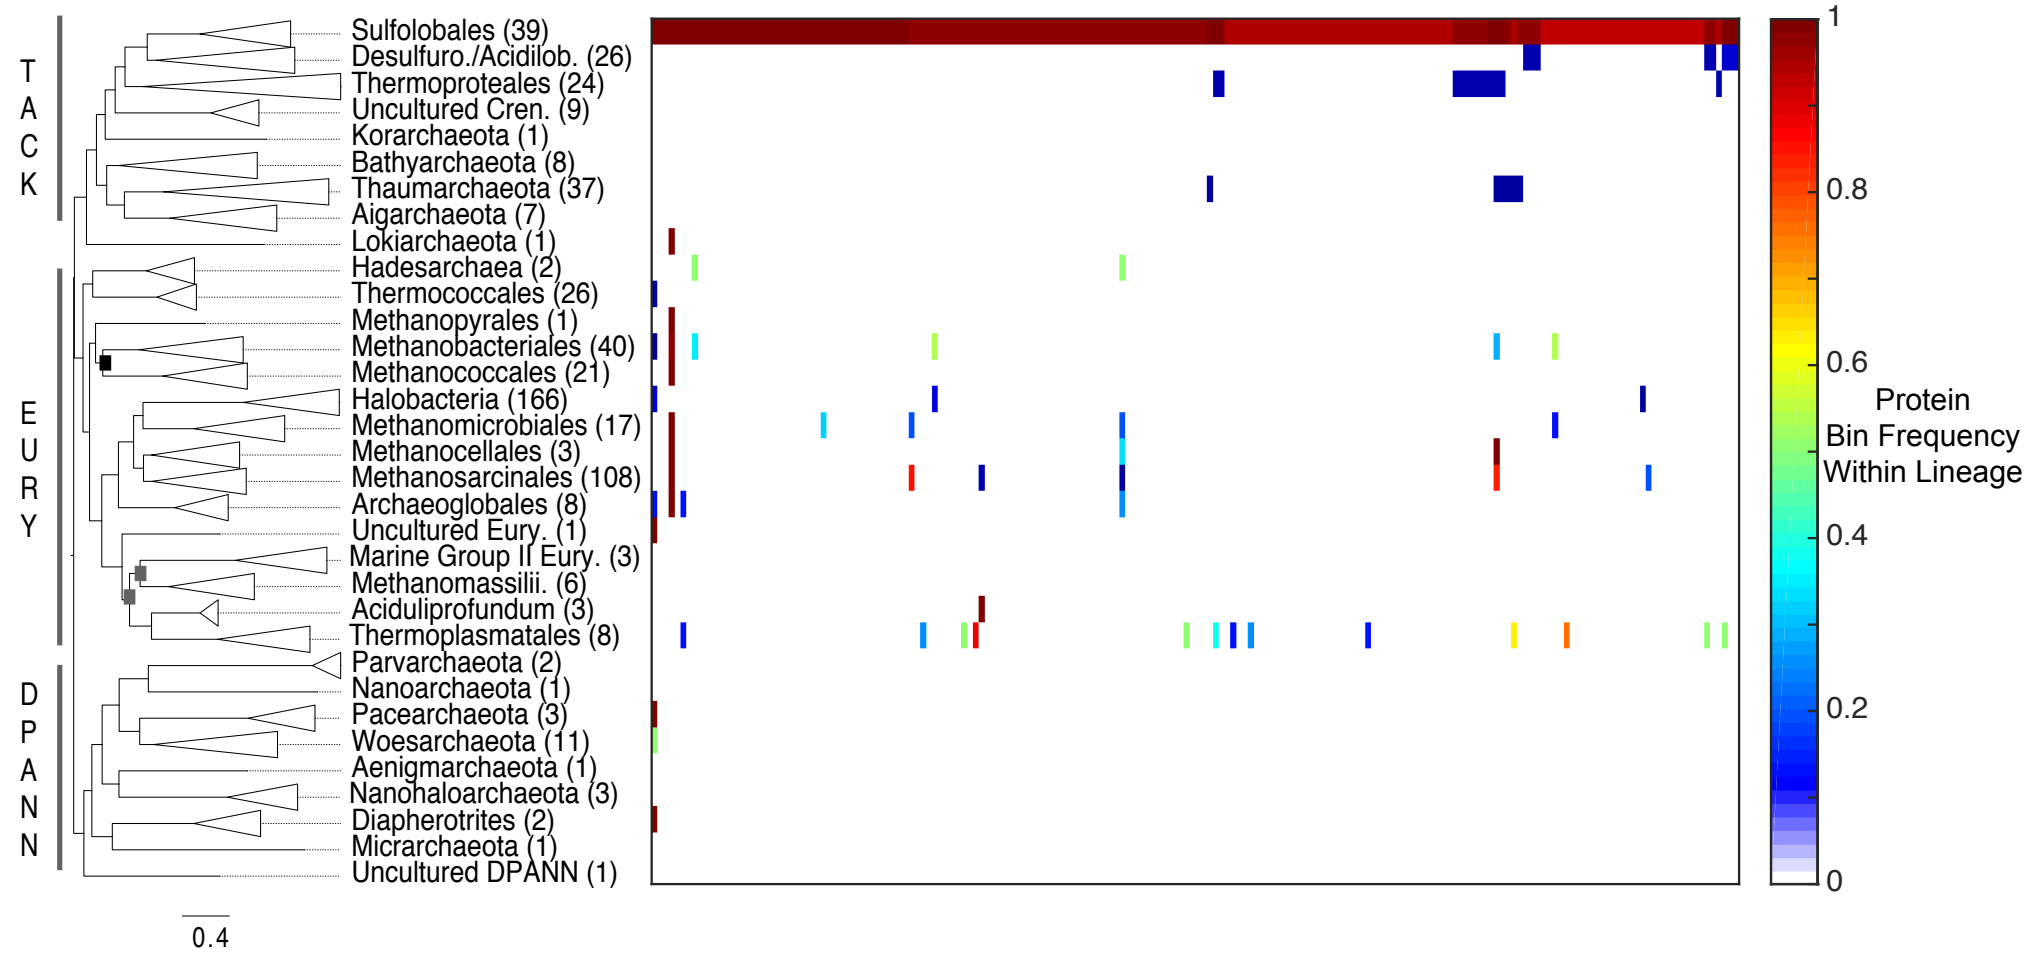

Supplement: ismej2017162x6.pdf [file ismej2017162x6.pdf]

# Supplementary Figure S6

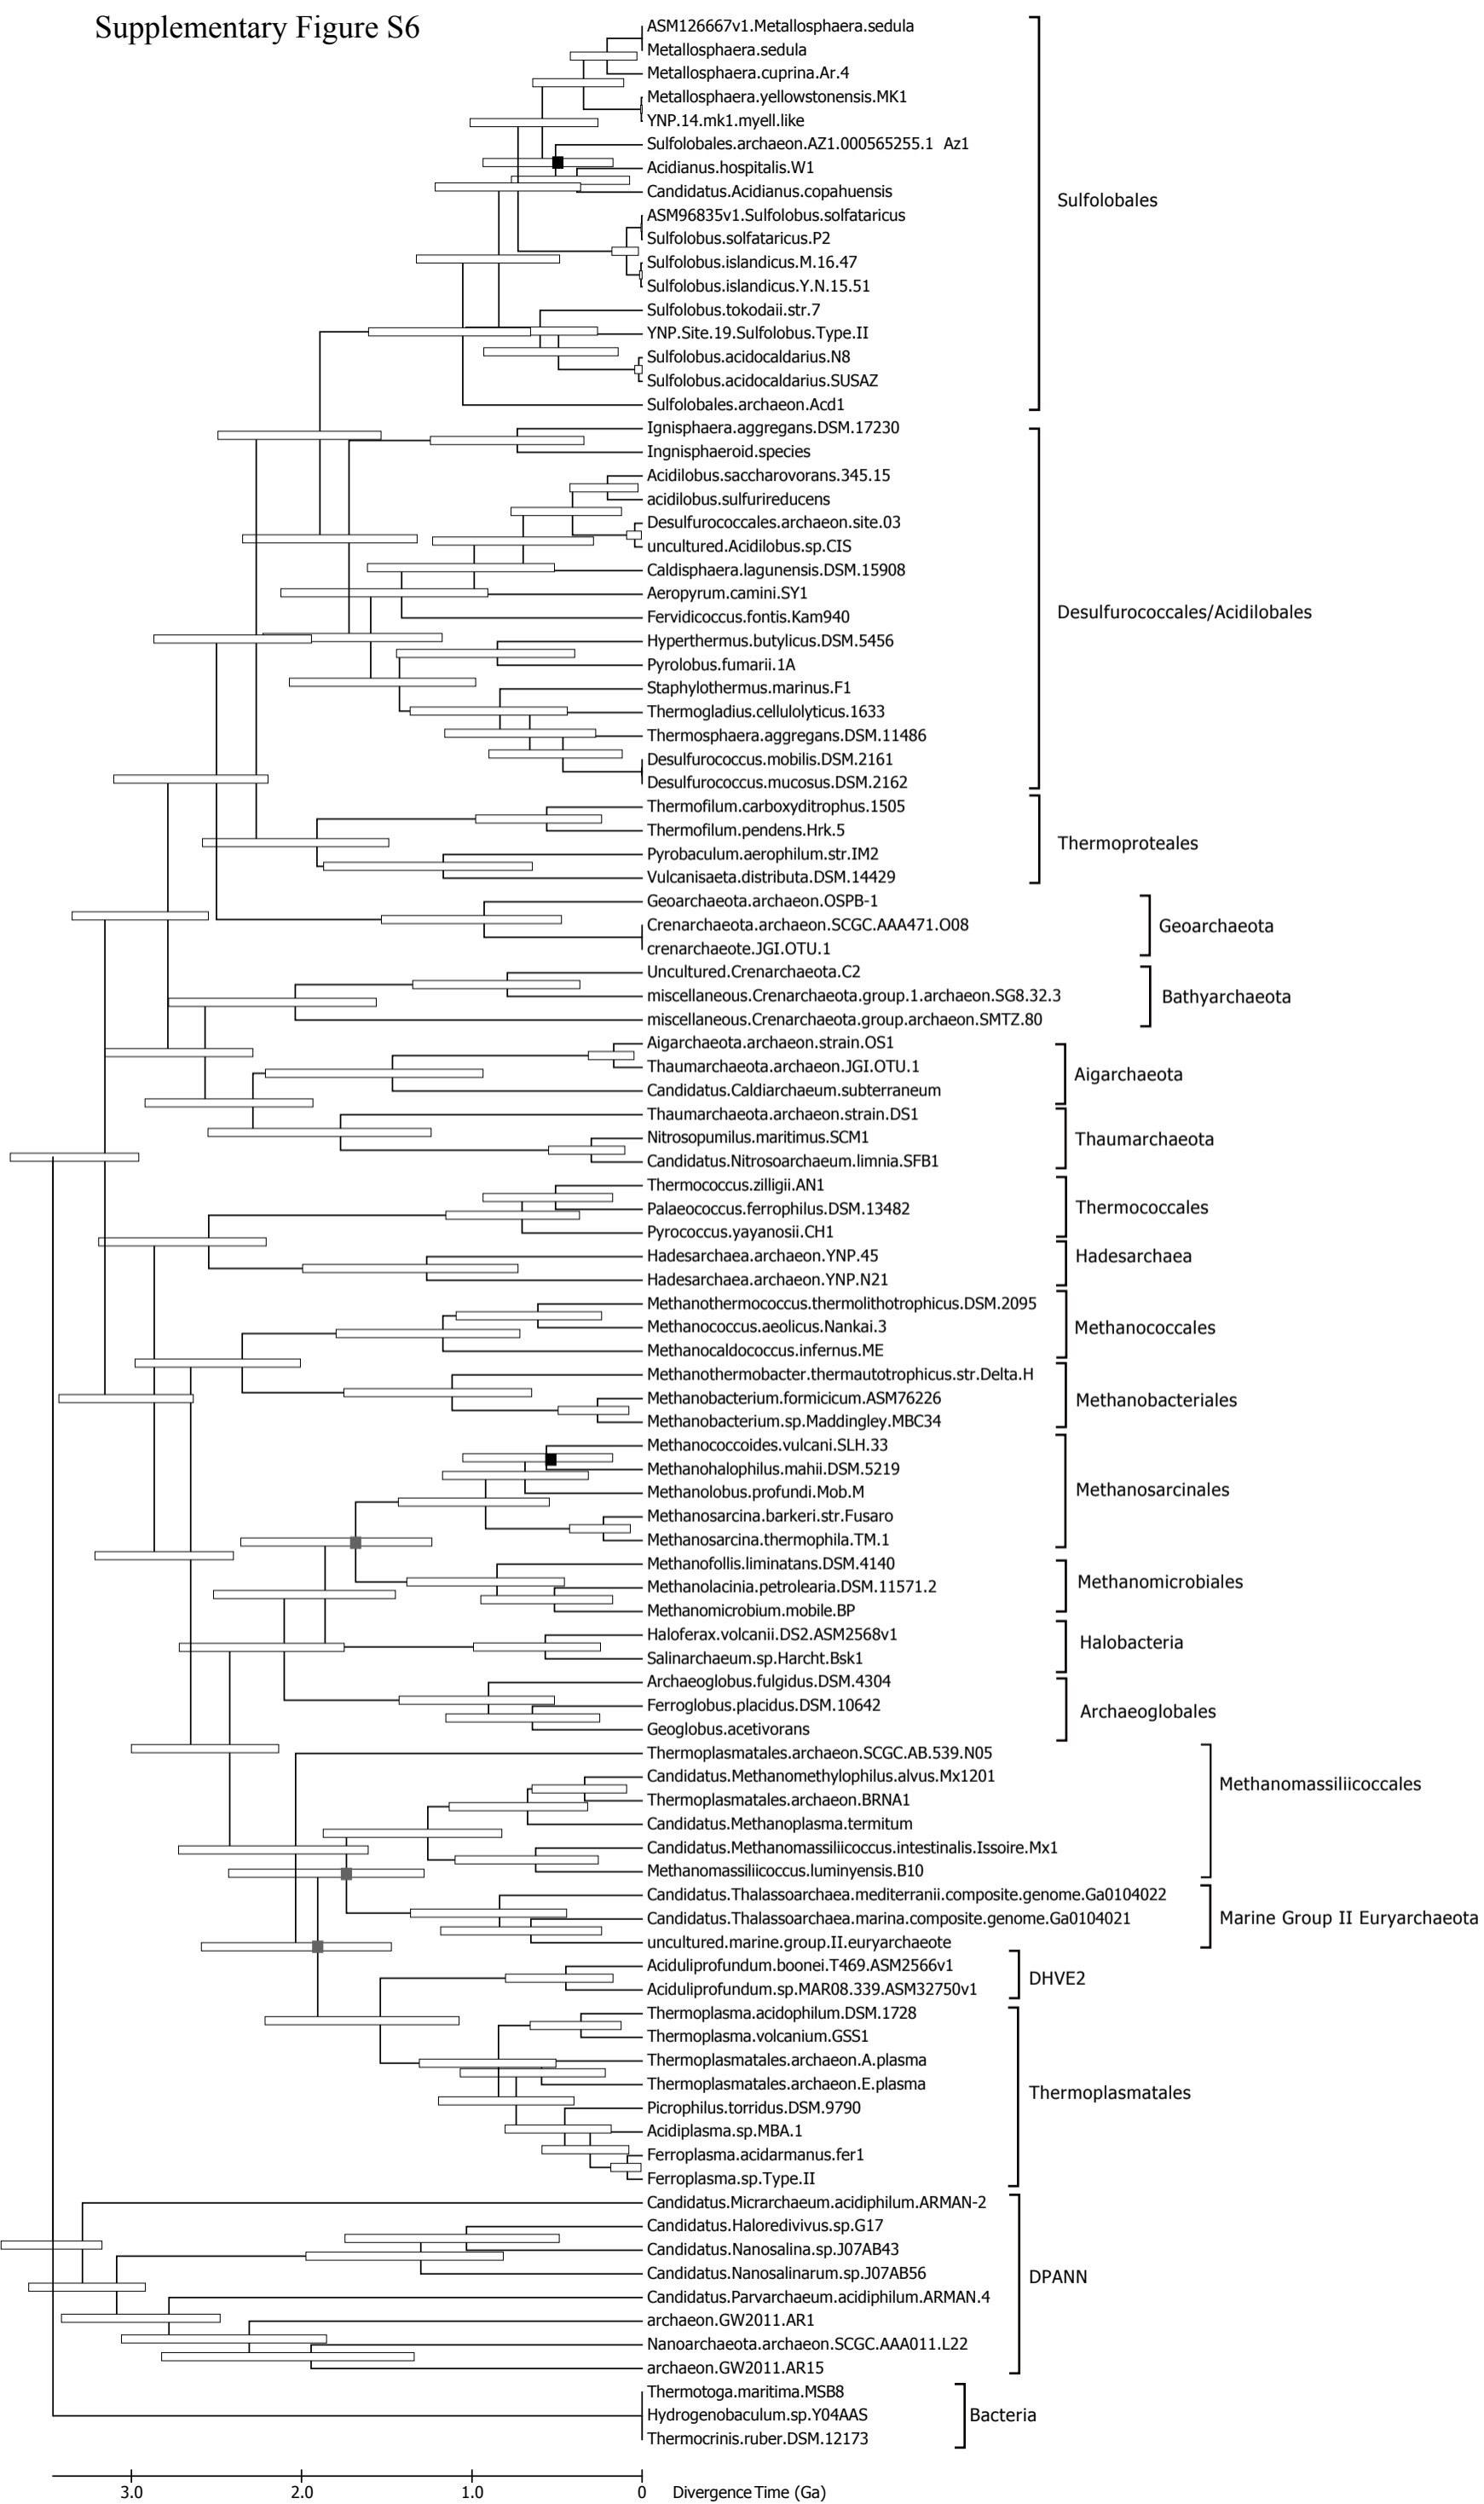

Supplement: ismej2017162x7.pdf [file ismej2017162x7.pdf]
